# Supplementary material for: Promoter architecture determines cotranslational regulation of mRNA
Source: HighWire-hosted journal article supplement (doi:10.1101/gr.230458.117), 2018-03-22

**A** premature stop (73%) no premature stop (27%)

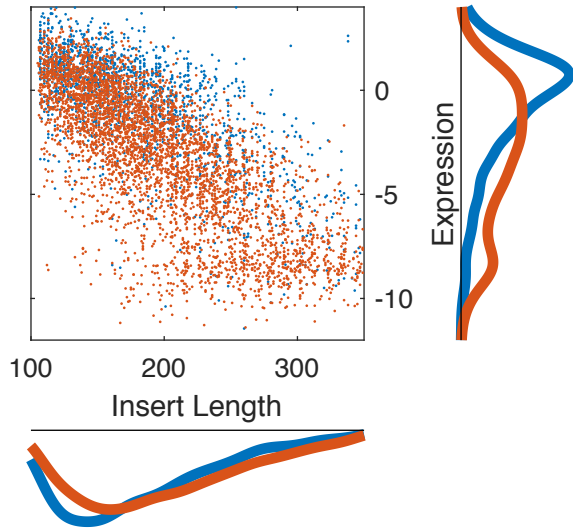

**B** reverse in ORF (34%) not in ORF (30%) fwd in ORF (36%)

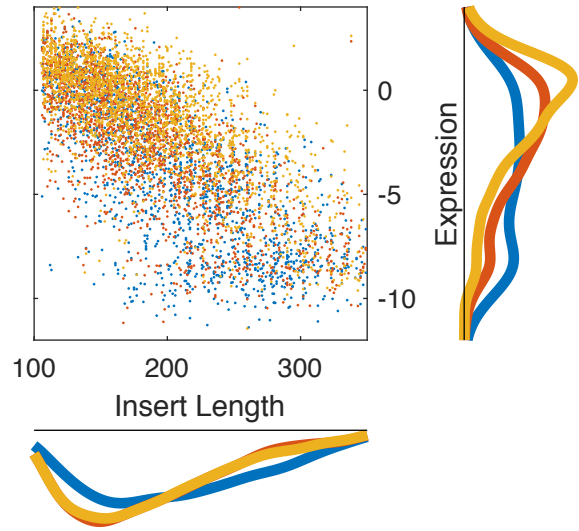

**C** out-of-frame in ORF (81%) in-frame in ORF (19%)

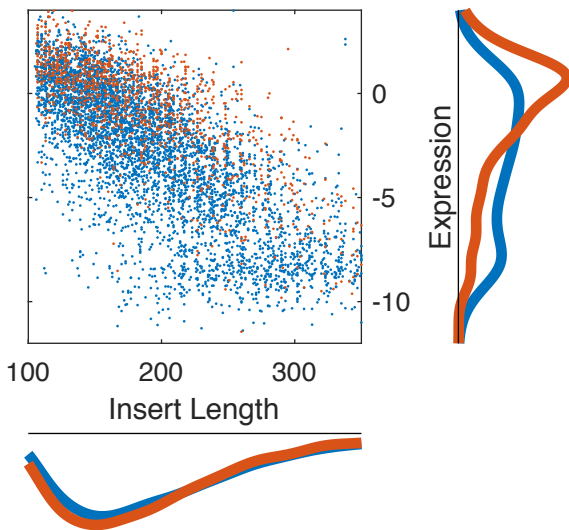

Supplement: Supplemental_Fig_S2.pdf [file Supplemental_Fig_S2.pdf]
