# Supplementary material for: Promoter architecture determines cotranslational regulation of mRNA
Source: HighWire-hosted journal article supplement (doi:10.1101/gr.230458.117), 2018-03-22
Supplement: Supplemental_Fig_S3.pdf [file Supplemental_Fig_S3.pdf]

# ORFs sequences

ATGNNNNNNNTGA  
ATGNNNNNNNTAG  
ATGNNNNNNNTAA  
...

Select features to predict expression

Unknown

Already described

Orientation respect to gDNA

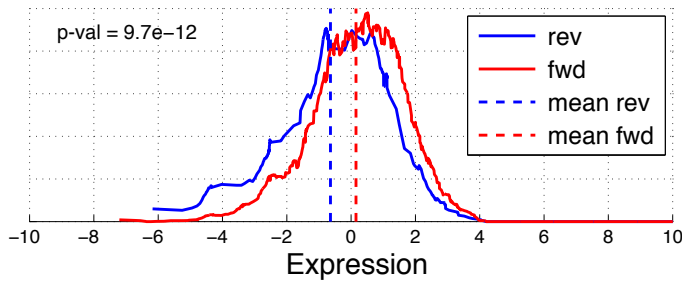

Codon bias (tAI)  
3'UTR length  
GC content  
Transcript length

Find sequence features able to distinguish forward oriented inserts than reverse (machine learning + sequential feature selection)

>4000 features to dozens

GLM classifier

Naive Bayes classifier

Tree Bagger classifier

C base count  
GA dimer count  
A or G in codon pos 1 (AG1)  
T or C in codon pos 3 (TC3)  
...

A count  
CG dimer count  
GAT codon count  
A in codon pos 2 (A2)  
...

A count  
GA dimer count  
A in codon pos 2 (A2)  
A or C in codon pos 2 (AC2)  
...

AUC = 0.79

AUC = 0.80

AUC = 0.80

**Final predictors**

Select and reduce the number of features that are able to predict expression

GLM  
(expression ~ classifiers selected features)

Pearson  $r^2 = 0.11$

Lasso

AG1  
AC2  
A2

Interpreted by the ribosome

Unknown mechanism (not used)

GAAAGA  
ACGTTA
