# Supplementary material for: Promoter architecture determines cotranslational regulation of mRNA
Source: HighWire-hosted journal article supplement (doi:10.1101/gr.230458.117), 2018-03-22
Supplement: Supplemental_FigLegends.docx [file Supplemental_FigLegends.docx]

# Supplementary Figures

**Supplemental Fig. 1. gDNA library and construct. (A)** Sequence details of the ClaI restriction site (dark blue) where fragments of the yeast genome are cloned. The construct contains a *GALL* promoter (left-bottom blue) a designed region where the ClaI site is located (bottom purple annotation) and the *CYC1* terminator (bottom yellow annotation). The designed region contains a start codon ATG (green), followed by the ClaI site and finishing with three stop codons (red) separated by one nucleotide to cover all possible reading frames. **(B)** Top: distribution of the genomic fragments inserted in the *GALL* library. Bottom: two example resulting strains after insertion of two chromosome I fragments. **(C)** Expression measurements across replicates are reproducible. Shown are two independent creations of the *GALL* promoter library, and one of the RPL4A library. We note that if differences in signal (experimental error) were responsible for the results, then we would expect the codon bias and NMD effects to be stronger in the experiments with a higher correlation between replicates. The opposite is true; both signals are also higher in the *RPL4A* library than in the *GALL* library #2 (see **Supplemental Fig. 5**). **(D)** Shown are the length and expression distribution for the entire *GALL* library (blue) and a small subset with similar insert length (133-153 nt) and GC content (0.35-0.45% GC). In this subset with expression varies by 4 orders of magnitude.

**Supplemental Fig. 2. Breakdown of expression by insert origin.** Inserts were classified according to (A) absence/presence of a PTC, (B) if they came from within an ORF or not, and (C) if the translational reading frame in our system is the same as the reading frame in the native gene.

**Supplemental Fig. 3. Flowchart of the steps followed to select the predictors of the ORF-expression model.** AUC = Area Under the Curve, GLM = Generalized Linear Model, Lasso = Least absolute shrinkage and selection operator, AG1 = Containing an A or a G in codon position 1, TC3 = Containing a T or A in codon position 3, A2 = Containing an A in codon position 2, AC2 = Containing an A or C in codon position 2.

**Supplemental Fig. 4. Several parameters of constitutive and regulated genes.** **(A)** mCherry expression of the NMD reporter constructs lacking a premature termination codon (PTC) between mCherry and YFP (see **Fig. 3D**), driven by the constitutive (blue) and regulated (red) promoter. Each construct was measured in wild-type, *upf1Δ* and *dbp2Δ* strains**.** Each point is from a different biological replicate. **(B)** The same as in (A), but for constructs bearing a PTC in the intervening mCherry-YFP linker. **(C,D)** The same as (A,B), but showingYFP expression measurements. **(E)** Distribution of RNA half-life values reported Neymotin et al [(Neymotin et al. 2014)](https://paperpile.com/c/Tap1cm/Y02No). Shown are these values for TATA (red) and TATA-less (blue) genes. The p value corresponds to a ttest. **(F)** Distribution of mRNA expression levels (in log2 TPM) for the same groups as in (E). The inset shows the expression distributions after removing ribosomal proteins. **(G)** tRNA Adaptation Index (tAI) scores for for the same groups as in (E). The line refers to the threshold used in the analysis of how tAI affects expression in native genes (see Results). (**H**) Shown are all of the coefficients for features used in the linear model that predicts expression from sequence features. 3’UTR length for native genes is zero as only features in the ORF are considered.

**Supplemental Fig. 5. The tAI effect of in-frame fully-contained fragments and reproducibility across replicates of the gDNA library.** **(A)** Shown are the correlation of tAI on insert length and GC content corrected expression for only the subset of inserts that lack a premature stop codon and that will be translated in the same reading frame in our library and in the native gene. **(B)** The *RPL4A* promoter library compared to the two *GALL* promoter libraries. While the two *GALL* promoter libraries have different correlations among replicates, the result is the same in both libraries.

**Supplemental Fig. 6. TATA-less genes are more affected by NMD at native transcripts with both short 3’UTRs and long 3’UTRs.** **(A,B)** NMD strength appears to have two regimes, transcripts with a 3’UTR length less than 250nt, and those with a longer 3’UTR. **(C,E)** TATA-less transcripts have a stronger NMD effect (p-value for a t-test of mean NMD effect) for transcripts with both short and long 3’UTRs. **(B,D,F)** Correlation between 3’UTR length and NMD strength for calculated from bootstrapped sampling of transcripts.

**Supplemental Fig. 7. Low *DBP2* expression correlates with a high tAI effect in TATA+ but not TATA-less genes across all DEE datasets.**  **(A)** The calculated the tAI effect for all RNA-seq datasets in yeast compared with the measured DBP2 expression. Lines show the median tAI effect and shaded error bars the standard deviation from bootstrapping. Experiments are binned by *DBP2* expression. Consistent with all our previous data, conditions and mutants with low DBP2 expression have a higher tAI effect for TATA+ genes and no change for TATA-less genes. **(B)** Shown is the ability of tAI to predict steady-state mRNA levels for an RNA-seq experiment performed in a WT genotype [(Beck et al. 2014)](https://paperpile.com/c/Tap1cm/nwxb6). Two example genes with different promoters (TATA, and TATA-less) show different changes regarding the effect of tAI in a *dbp2Δ* strain, performed under the same conditions.

**Supplemental Fig. 8. Dbp2 physically interacts with general transcription factors, chromatin, nuclear export machinery and translational machinery.** **(A)** Dbp2 physical interactome of protein-protein interactions [(Cherry et al. 2012)](https://paperpile.com/c/Tap1cm/8tTNw). Dbp2 interacts with ribosomal, histone H3 and General Transcription Factors (GTFs) of Pol-II (TAF1 is the yeast ortholog of the mammalian TFIIE).

# Supplementary Tables

**Supplemental Table 1:** Properties of the inserts in the ORF library

**Supplemental Table 2:** Results of Gene Ontology Analysis

**Supplemental Table 3:** Table of strains and plasmids used in this study

**Supplemental Table 4:** Table of used primers

**Supplemental Table 5:** PCR Primer barcode combination

**Supplemental Table 6:** Nucleotide sequences of 5' and 3' regions of random ORF library plasmid construct (5' to 3')
