# Supplementary figures and images for: Promoter architecture determines cotranslational regulation of mRNA
Source: HighWire-hosted journal article supplement (doi:10.1101/gr.230458.117), 2018-03-22

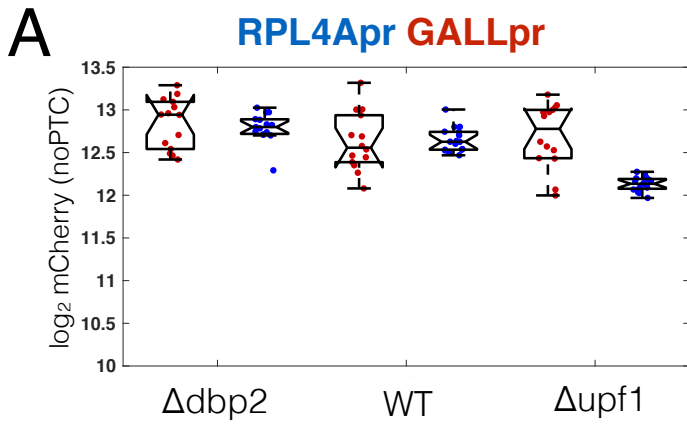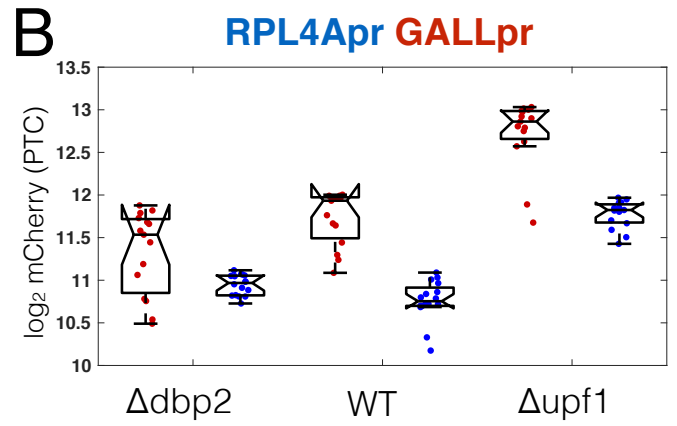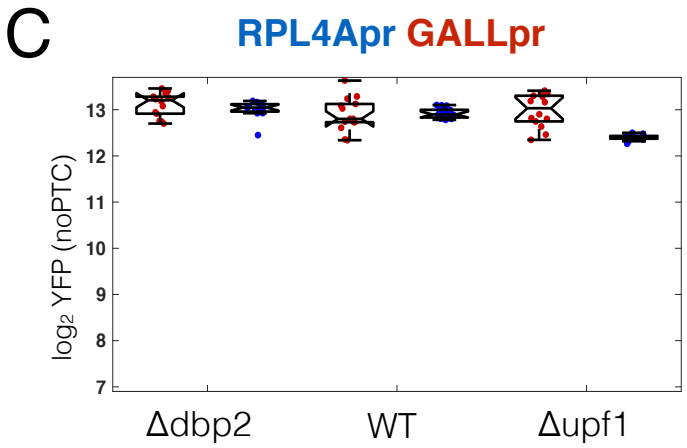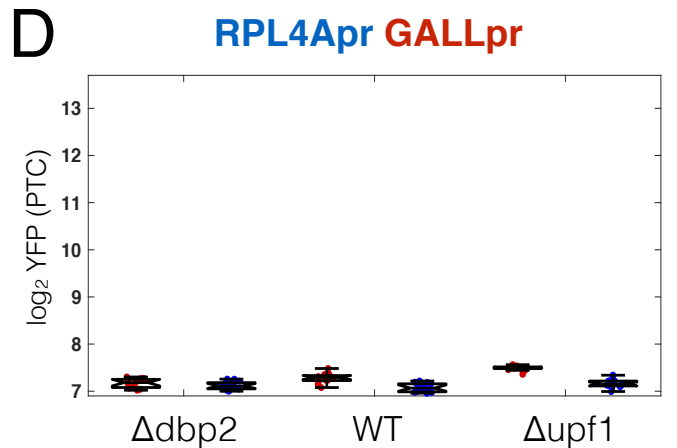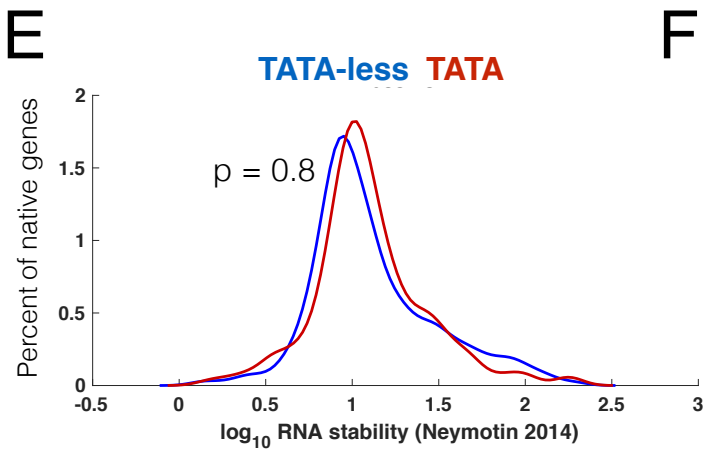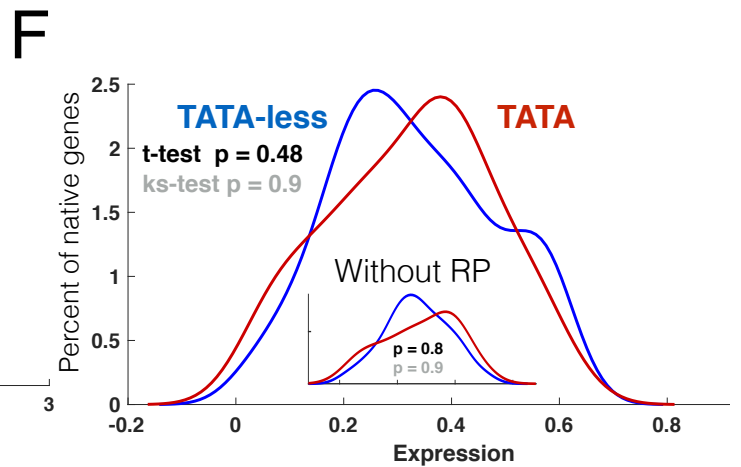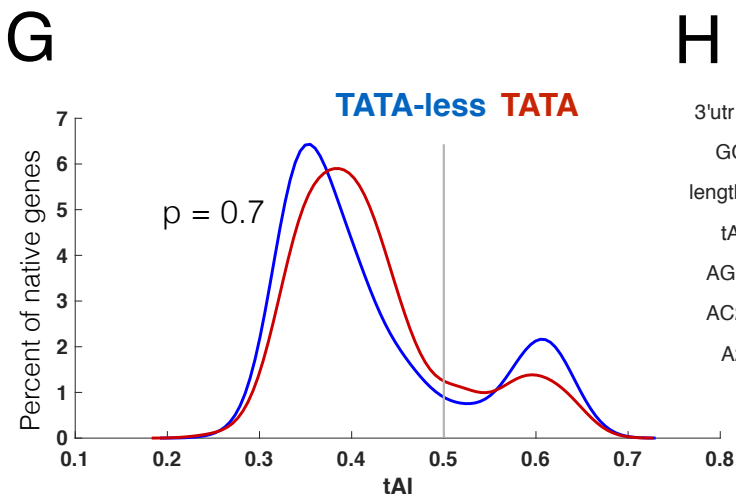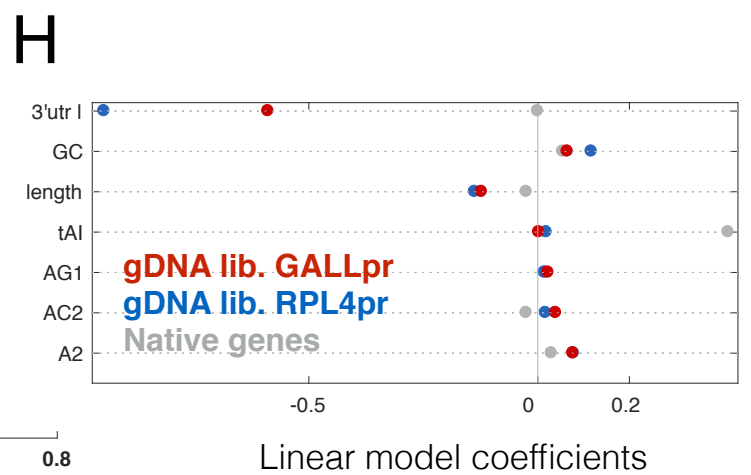

Supplement: Supplemental_Fig_S4.pdf [file Supplemental_Fig_S4.pdf]

## Inserts in-frame of ORF

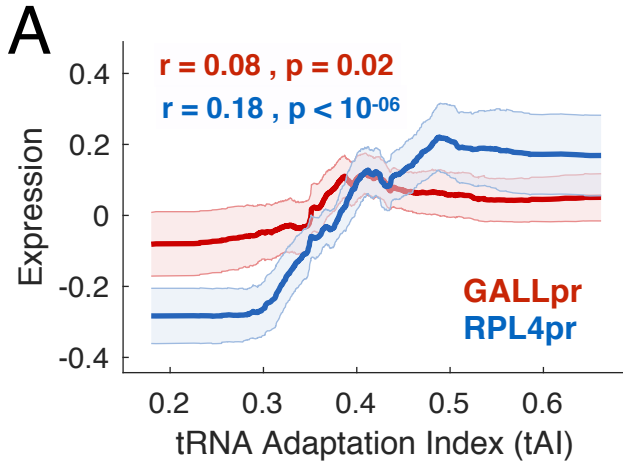

**B**

### Using the GALLpr #1 library

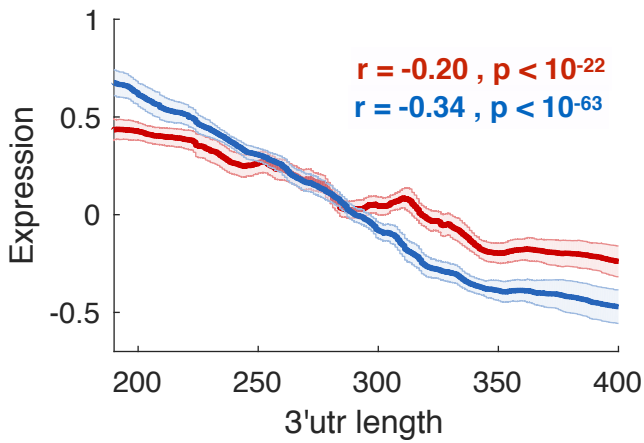

### Using the GALLpr #2 library

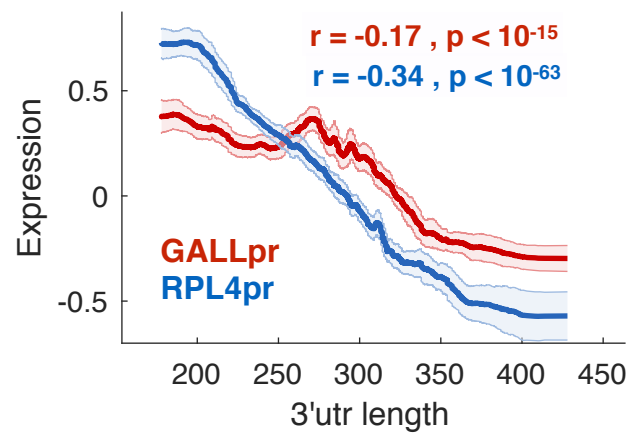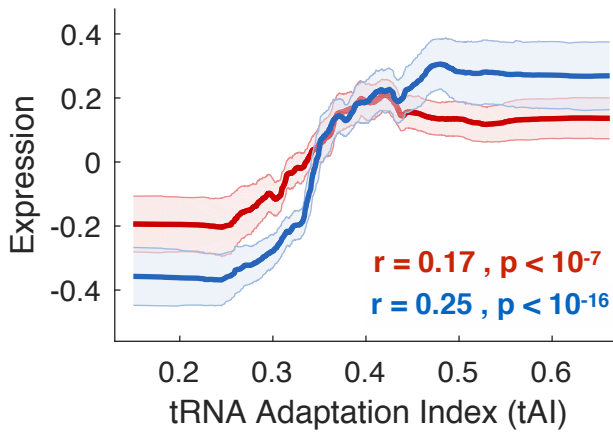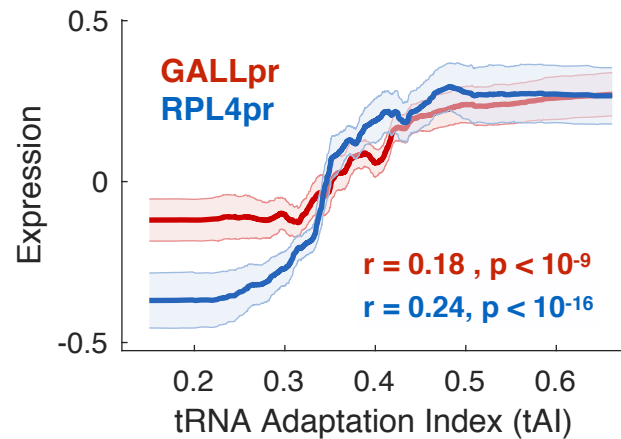

Supplement: Supplemental_Fig_S5.pdf [file Supplemental_Fig_S5.pdf]

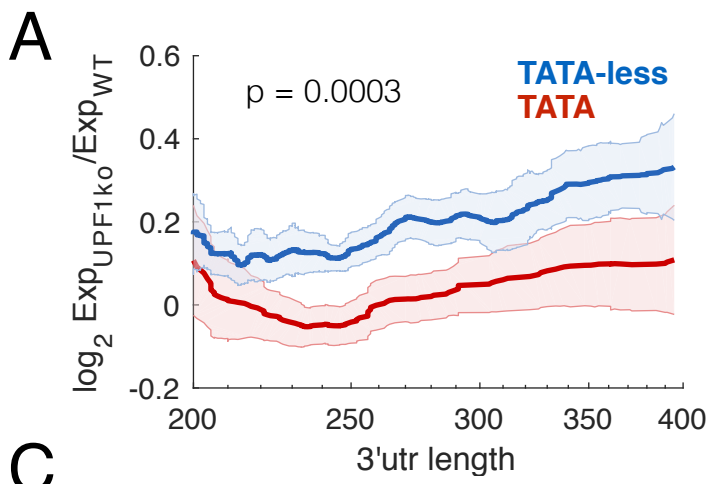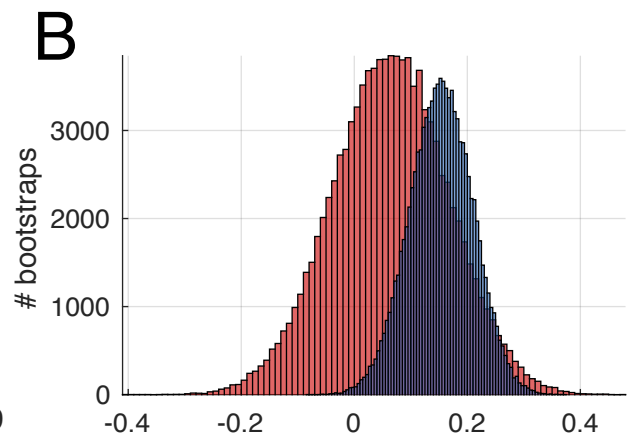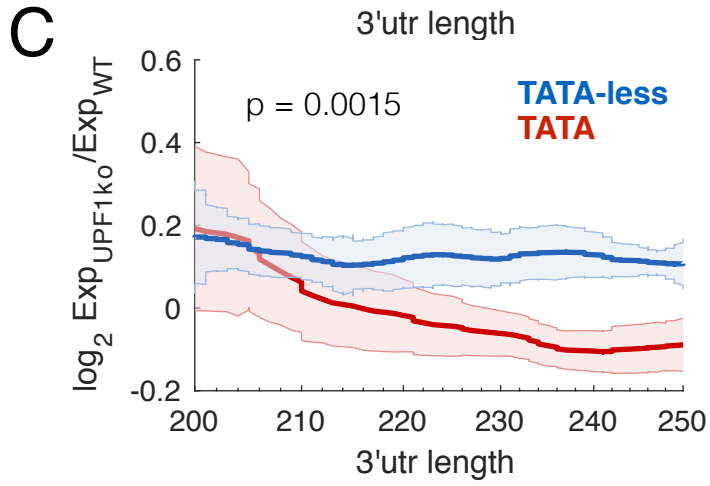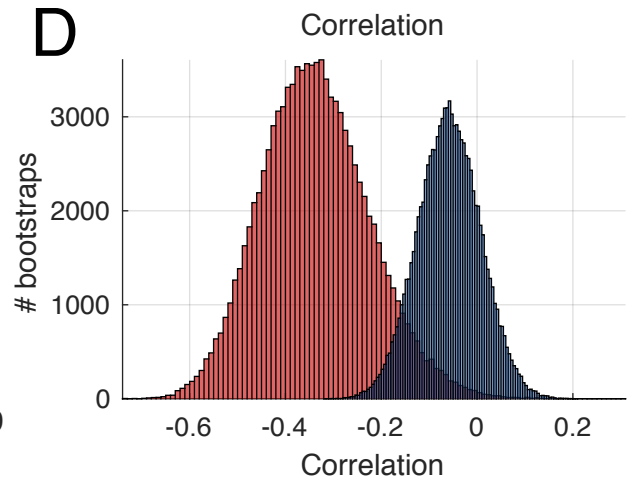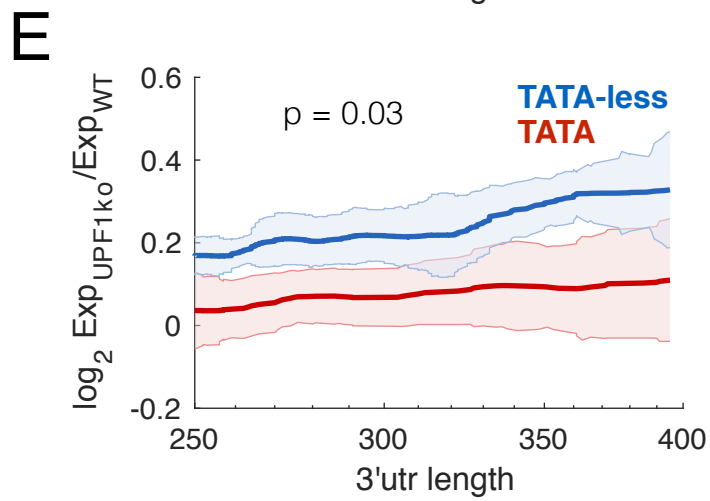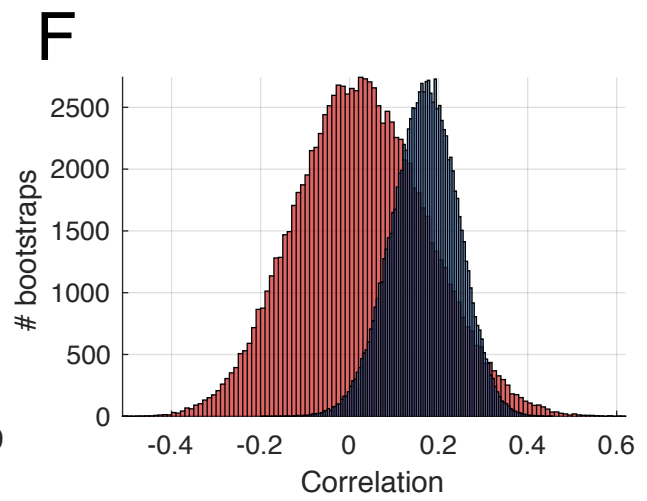

Supplement: Supplemental_Fig_S6.pdf [file Supplemental_Fig_S6.pdf]
